# Supplementary material for: The Effects of Vaccination and Immunity on Bacterial Infection Dynamics In Vivo
Source: PLOS journal article supplement (doi:10.1371/journal.ppat.1004359), 2014-09-18

**Figure S7:** Correlation coefficients with 95% confidence intervals for the relative abundance of individual WITS between liver and spleen at the indicated times (hr) post-challenge; each dot represents a single mouse. Highlighted in red are those mice with a confidence interval that does not include zero. Animals with bacteria absent from the spleen or liver or both are not included.

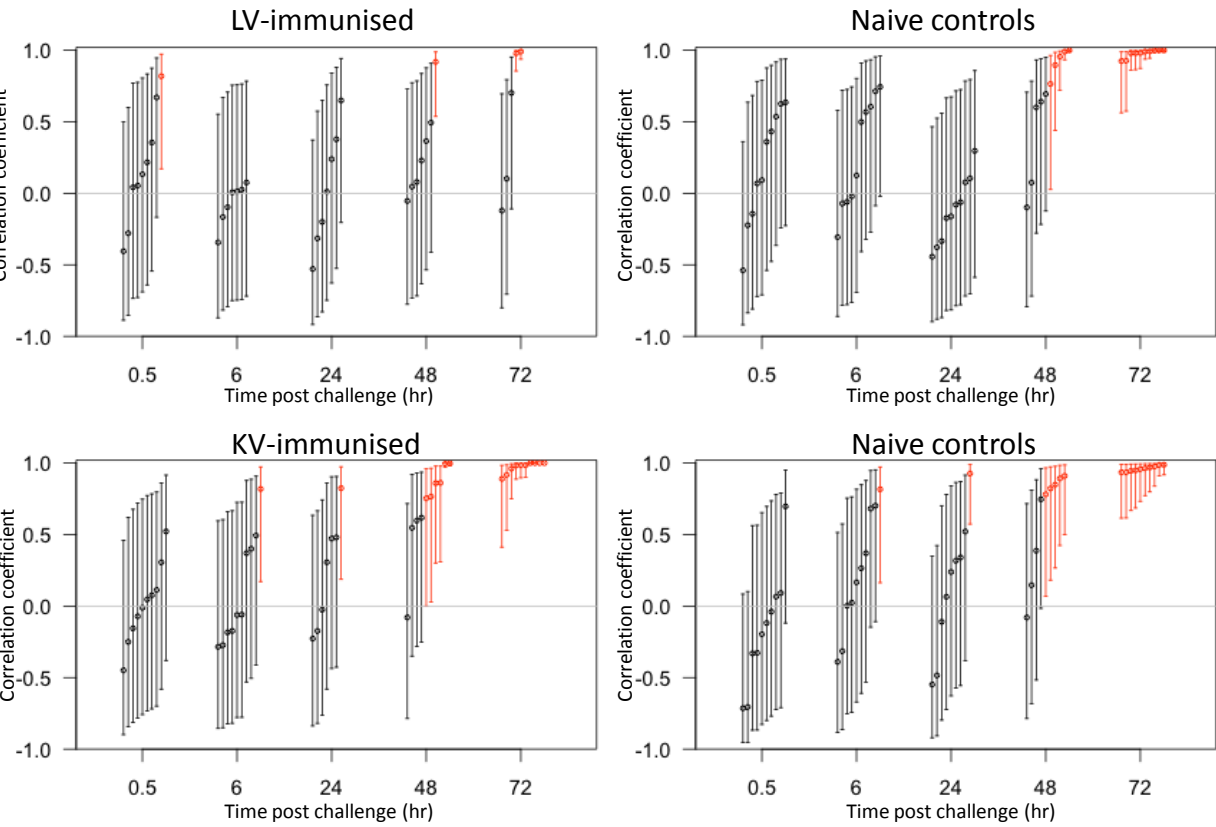

Supplement: S7 (10.1371/journal.ppat.1004359.s007) [file journal.ppat.1004359.s007]
